# Supplementary material for: Illuminating biological pathways for drug targeting in head and neck squamous cell carcinoma
Source: PLoS One. 2019 Oct 9;14(10):e0223639. doi: 10.1371/journal.pone.0223639 (PMC6785123; doi:10.1371/journal.pone.0223639)
Supplement: S1 Table — All significant mutation enriched (FDR<0.05) pathways that contain drug targets. (XLSX) [file pone.0223639.s001.xlsx]

## Sheet: FullCohort_Light
path number	path_id	full_path_length.x	testable_path_length.x	drug_targeted_genes	proportion_drug_targeted	full_path_length.y	testable_path_length.y	aberrational_genes	proportion_aberrational	proportion_of_cohort_w_aberrational_gene_in_path	Num_patient_with_aberrational_gene_.s._in_path	count_of_aberrational_genes_in_path_cross_cohort	max_in_one_gene	min_in_one_gene	hyperg_p_value	hyperg_p_w_FDR
8	Activation of the AP-1 family of transcription factors	10	10	8	0.8	10	10	10	1	0.0532544	27	29	8	1	0	0
24	Recycling of bile acids and salts	15	15	7	0.466667	15	15	15	1	0.116371	59	73	10	1	0	0
26	Sema3A PAK dependent Axon repulsion	16	16	7	0.4375	16	16	16	1	0.193294	98	117	17	2	0	0
2	RSK activation	6	6	6	1	6	6	6	1	0.0532544	27	29	8	1	0	0
12	DSCAM interactions	11	11	6	0.545455	11	11	11	1	0.153846	78	87	23	1	0	0
14	CD28 dependent Vav1 pathway	12	12	6	0.5	12	12	12	1	0.0749507	38	42	12	1	0	0
1	Abacavir transmembrane transport	5	5	5	1	5	5	5	1	0.0512821	26	26	15	1	0	0
32	Downregulation of ERBB2:ERBB3 signaling	13	13	5	0.384615	13	13	13	1	0.104536	53	56	12	1	0	0
56	Growth hormone receptor signaling	24	24	5	0.208333	24	24	24	1	0.142012	72	81	9	1	0	0
25	G2/M DNA damage checkpoint	9	9	4	0.444444	9	9	9	1	0.0887574	45	49	20	1	0	0
44	Constitutive Signaling by EGFRvIII	15	15	4	0.266667	15	15	15	1	0.280079	142	167	85	1	0	0
45	CRMPs in Sema3A signaling	16	16	4	0.25	16	16	16	1	0.169625	86	106	17	1	0	0
50	Ras activation uopn Ca2+ infux through NMDA receptor	17	17	4	0.235294	17	17	17	1	0.230769	117	150	28	1	0	0
51	Unblocking of NMDA receptor, glutamate binding and activation	17	17	4	0.235294	17	17	17	1	0.218935	111	145	28	1	0	0
54	Constitutive Signaling by Ligand-Responsive EGFR Cancer Variants	19	19	4	0.210526	19	19	19	1	0.287968	146	176	85	1	0	0
62	Xenobiotics	20	20	4	0.2	20	20	20	1	0.110454	56	62	6	1	0	0
68	Nephrin interactions	22	22	4	0.181818	22	22	22	1	0.35503	180	231	85	1	0	0
9	AKT-mediated inactivation of FOXO1A	4	4	3	0.75	4	4	4	1	0.0315582	16	16	7	2	0	0
11	Chk1/Chk2(Cds1) mediated inactivation of Cyclin B:Cdk1 complex	5	5	3	0.6	5	5	5	1	0.0157791	8	8	3	1	0	0
22	p75NTR negatively regulates cell cycle via SC1	6	6	3	0.5	6	6	6	1	0.0216963	11	11	4	1	0	0
27	MEK activation	7	7	3	0.428571	7	7	7	1	0.0769231	39	41	28	1	0	0
28	RAF phosphorylates MEK	7	7	3	0.428571	7	7	7	1	0.0769231	39	41	28	1	0	0
33	Organic cation transport	8	8	3	0.375	8	8	8	1	0.0414201	21	21	7	1	0	0
52	Organic cation/anion/zwitterion transport	13	13	3	0.230769	13	13	13	1	0.0650888	33	39	7	1	0	0
6	Signalling to ERK5	2	2	2	1	2	2	2	1	0.0157791	8	8	5	3	0	0
10	Activation of BIM and translocation to mitochondria	3	3	2	0.666667	3	3	3	1	0.00591716	3	3	1	1	0	0
17	Neurophilin interactions with VEGF and VEGFR	4	4	2	0.5	4	4	4	1	0.0571992	29	33	12	4	0	0
13	Adenosine P1 receptors	4	4	2	0.5	4	4	4	1	0.0138067	7	7	3	1	0	0
30	GRB7 events in ERBB2 signaling	5	5	2	0.4	5	5	5	1	0.0493097	25	25	12	1	0	0
31	NGF-independant TRKA activation	5	5	2	0.4	5	5	5	1	0.0276134	14	15	5	2	0	0
29	AMPK inhibits chREBP transcriptional activation activity	5	5	2	0.4	5	5	5	1	0.0216963	11	11	4	1	0	0
39	Klotho-mediated ligand binding	6	6	2	0.333333	6	6	6	1	0.0433925	22	22	5	1	0	0
34	Activation of TRKA receptors	6	6	2	0.333333	6	6	6	1	0.0295858	15	16	5	1	0	0
47	HuR stabilizes mRNA	8	8	2	0.25	8	8	8	1	0.0650888	33	33	9	1	0	0
67	Import of palmitoyl-CoA into the mitochondrial matrix	11	11	2	0.181818	11	11	11	1	0.108481	55	57	17	1	0	0
69	Recruitment of NuMA to mitotic centrosomes	11	11	2	0.181818	11	11	11	1	0.0927022	47	51	13	1	0	0
66	CYP2E1 reactions	11	11	2	0.181818	11	11	11	1	0.0729783	37	40	6	1	0	0
74	Glycogen breakdown (glycogenolysis)	14	14	2	0.142857	14	14	14	1	0.0887574	45	50	10	1	0	0
75	Fatty acids	15	15	2	0.133333	15	15	15	1	0.102564	52	60	8	2	0	0
82	Na+/Cl- dependent neurotransmitter transporters	19	19	2	0.105263	19	19	19	1	0.120316	61	69	10	1	0	0
7	t(4;14) translocations of FGFR3	1	1	1	1	1	1	1	1	0.0177515	9	9	9	9	0	0
5	Signaling by FGFR4 mutants	1	1	1	1	1	1	1	1	0.00788955	4	4	4	4	0	0
4	Signaling by FGFR2 amplification mutants	1	1	1	1	1	1	1	1	0.00591716	3	3	3	3	0	0
3	Signaling by FGFR1 amplification mutants	1	1	1	1	1	1	1	1	0.00197239	1	1	1	1	0	0
16	Inhibition of Signaling by Overexpressed EGFR	2	2	1	0.5	2	2	2	1	0.0374753	19	20	13	7	0	0
23	phospho-PLA2 pathway	2	2	1	0.5	2	2	2	1	0.0197239	10	10	8	2	0	0
19	Regulation of PAK-2p34 activity by PS-GAP/RHG10	2	2	1	0.5	2	2	2	1	0.0177515	9	9	5	4	0	0
20	Stimulation of the cell death response by PAK-2p34	2	2	1	0.5	2	2	2	1	0.0138067	7	7	5	2	0	0
15	Inhibition of HSL	2	2	1	0.5	2	2	2	1	0.00986193	5	5	3	2	0	0
18	PDE3B signalling	2	2	1	0.5	2	2	2	1	0.00986193	5	5	3	2	0	0
21	TRKA activation by NGF	2	2	1	0.5	2	2	2	1	0.00788955	4	4	3	1	0	0
40	Oxygen-dependent asparagine hydroxylation of Hypoxia-inducible Factor Alpha	3	3	1	0.333333	3	3	3	1	0.025641	13	14	8	3	0	0
43	betaKlotho-mediated ligand binding	3	3	1	0.333333	3	3	3	1	0.0236686	12	12	5	3	0	0
37	Inhibition of TSC complex formation by PKB	3	3	1	0.333333	3	3	3	1	0.0216963	11	11	6	2	0	0
35	FGFR1c and Klotho ligand binding and activation	3	3	1	0.333333	3	3	3	1	0.0197239	10	10	5	1	0	0
42	Signalling to STAT3	3	3	1	0.333333	3	3	3	1	0.0197239	10	10	6	1	0	0
38	Interactions of Tat with host cellular proteins	3	3	1	0.333333	3	3	3	1	0.0177515	9	9	4	2	0	0
36	GABA A (rho) receptor activation	3	3	1	0.333333	3	3	3	1	0.0138067	7	7	4	1	0	0
41	STAT6-mediated induction of chemokines	3	3	1	0.333333	3	3	3	1	0.0138067	7	7	3	2	0	0
48	Processing of DNA ends prior to end rejoining	4	4	1	0.25	4	4	4	1	0.061144	31	33	23	2	0	0
49	Proton/oligonucleotide cotransporters	4	4	1	0.25	4	4	4	1	0.0197239	10	10	4	1	0	0
46	Carnitine synthesis	4	4	1	0.25	4	4	4	1	0.0118343	6	6	3	1	0	0
58	Disinhibition of SNARE formation	5	5	1	0.2	5	5	5	1	0.0631164	32	35	11	4	0	0
61	RAF activation	5	5	1	0.2	5	5	5	1	0.0631164	32	32	28	1	0	0
60	Nicotinamide salvaging	5	5	1	0.2	5	5	5	1	0.0414201	21	22	7	1	0	0
59	FGFR1b ligand binding and activation	5	5	1	0.2	5	5	5	1	0.0138067	7	8	3	1	0	0
71	Nonhomologous End-joining (NHEJ)	6	6	1	0.166667	6	6	6	1	0.0788955	40	43	23	2	0	0
72	Release of eIF4E	6	6	1	0.166667	6	6	6	1	0.0335306	17	18	9	1	0	0
76	Downregulation of ERBB4 signaling	8	8	1	0.125	8	8	8	1	0.0729783	37	41	17	1	0	0
77	Synthesis of epoxy (EET) and dihydroxyeicosatrienoic acids (DHET)	8	8	1	0.125	8	8	8	1	0.0650888	33	33	6	1	0	0
78	Transport of gamma-carboxylated protein precursors from the endoplasmic reticulum to the Golgi apparatus	8	8	1	0.125	8	8	8	1	0.0512821	26	28	10	1	0	0
79	Gamma-carboxylation of protein precursors	9	9	1	0.111111	9	9	9	1	0.0591716	30	33	10	1	0	0
80	Removal of aminoterminal propeptides from gamma-carboxylated proteins	9	9	1	0.111111	9	9	9	1	0.0532544	27	29	10	1	0	0
84	IRAK2 mediated activation of TAK1 complex	10	10	1	0.1	10	10	10	1	0.0532544	27	32	6	1	0	0
85	IRAK2 mediated activation of TAK1 complex upon TLR7/8 or 9 stimulation	10	10	1	0.1	10	10	10	1	0.0532544	27	32	6	1	0	0
83	E2F-enabled inhibition of pre-replication complex formation	10	10	1	0.1	10	10	10	1	0.0433925	22	24	5	1	0	0
86	Tryptophan catabolism	11	11	1	0.0909091	11	11	11	1	0.061144	31	33	6	1	0	0
88	Caspase-mediated cleavage of cytoskeletal proteins	12	12	1	0.0833333	12	12	12	1	0.205128	104	122	42	1	0	0
89	Mitotic Telophase/Cytokinesis	14	14	1	0.0714286	14	14	14	1	0.138067	70	77	23	1	0	0
90	repression of WNT target genes	14	14	1	0.0714286	14	14	14	1	0.0729783	37	42	10	1	0	0
97	TRP channels	25	25	1	0.04	25	25	25	1	0.244576	124	166	17	1	0	0
100	Kinesins	27	27	1	0.037037	27	27	27	1	0.216963	110	134	16	1	0	0
53	Apoptotic cleavage of cellular proteins	38	38	8	0.210526	38	38	37	0.973684	0.353057	179	263	42	0	0.000354949	0.0146338
65	Cytochrome P450 - arranged by substrate type	60	60	11	0.183333	60	60	58	0.966667	0.295858	150	205	8	0	5.26505e-05	0.00246631
105	Collagen formation	86	86	2	0.0232558	86	86	83	0.965116	0.579882	294	675	38	0	3.25904e-06	0.000156592
101	ECM proteoglycans	55	55	2	0.0363636	55	55	53	0.963636	0.457594	232	414	36	0	0.000138802	0.00594763
94	NRAGE signals death through JNK	45	45	2	0.0444444	45	45	43	0.955556	0.362919	184	266	32	0	0.000940776	0.0384224
102	Stimuli-sensing channels	98	98	3	0.0306122	98	98	93	0.94898	0.585799	297	609	51	0	1.5426e-05	0.000730453
109	Transport of inorganic cations/anions and amino acids/oligopeptides	94	94	1	0.0106383	94	94	89	0.946809	0.433925	220	346	20	0	3.05203e-05	0.00143481
55	Centrosome maturation	72	72	15	0.208333	72	72	68	0.944444	0.420118	213	347	28	0	0.000259072	0.0108174
57	Recruitment of mitotic centrosome proteins and complexes	72	72	15	0.208333	72	72	68	0.944444	0.420118	213	347	28	0	0.000259072	0.0108174
99	Assembly of collagen fibrils and other multimeric structures	54	54	2	0.037037	54	54	51	0.944444	0.473373	240	461	38	0	0.00113397	0.0458828
103	Integrin cell surface interactions	66	66	2	0.030303	66	66	62	0.939394	0.42998	218	347	18	0	0.000713993	0.0293438
104	Ion channel transport	167	167	5	0.0299401	167	167	156	0.934132	0.700197	355	971	51	0	1.33052e-06	6.44031e-05
92	Extracellular matrix organization	266	266	14	0.0526316	266	266	247	0.928571	0.820513	416	1642	42	0	1.0798e-08	5.24614e-07
73	Anchoring of the basal body to the plasma membrane	89	89	14	0.157303	89	89	82	0.921348	0.453649	230	398	28	0	0.00105278	0.0427297
63	L1CAM interactions	97	97	19	0.195876	97	97	89	0.917526	0.625247	317	685	28	0	0.00104634	0.0426005
110	Rho GTPase cycle	121	121	1	0.00826446	121	121	111	0.917355	0.56213	285	608	32	0	0.000329701	0.0136358
111	Signaling by Rho GTPases	121	121	1	0.00826446	121	121	111	0.917355	0.56213	285	608	32	0	0.000329701	0.0136358
98	SLC-mediated transmembrane transport	259	259	10	0.03861	259	259	235	0.907336	0.686391	348	868	20	0	5.02072e-06	0.000239477
87	Neuronal System	280	280	24	0.0857143	280	280	253	0.903571	0.802761	407	1371	28	0	5.54741e-06	0.000263637
95	Chromatin modifying enzymes	208	208	9	0.0432692	208	208	187	0.899038	0.719921	365	975	53	0	0.000163678	0.00690045
96	Chromatin organization	208	208	9	0.0432692	208	208	187	0.899038	0.719921	365	975	53	0	0.000163678	0.00690045
64	Axon guidance	327	327	63	0.192661	327	327	292	0.892966	0.899408	456	2015	28	0	1.57435e-05	0.000742798
106	Glycogen storage diseases	257	257	5	0.0194553	257	257	229	0.891051	0.712032	361	901	44	0	0.000160112	0.00679396
107	Metabolism of carbohydrates	257	257	5	0.0194553	257	257	229	0.891051	0.712032	361	901	44	0	0.000160112	0.00679396
108	Myoclonic epilepsy of Lafora	257	257	5	0.0194553	257	257	229	0.891051	0.712032	361	901	44	0	0.000160112	0.00679396
81	Transmission across Chemical Synapses	201	201	22	0.109453	201	201	179	0.890547	0.708087	359	970	28	0	0.000765752	0.0313723
91	Generic Transcription Pathway	483	483	26	0.0538302	483	483	428	0.886128	0.838264	425	1891	66	0	1.86527e-06	8.9954e-05
93	Transmembrane transport of small molecules	618	618	32	0.0517799	618	618	541	0.875405	0.930966	472	2594	51	0	3.96067e-06	0.000189607
70	Developmental Biology	519	519	87	0.16763	519	519	450	0.867052	0.940828	477	2743	66	0	0.000213984	0.0089923
